# Supplementary material for: Hyaluronan-directed fabrication of co-doped hydroxyapatite as a dual-modal probe for tumor-specific bioimaging
Source: Royal Society of Chemistry journal article supplement (doi:10.1039/c9tb02787d), 2020-01-01
Supplement: c9tb02787d1.pdf [file c9tb02787d1.pdf]

## Supplementary Information

### **Hyaluronan-Directed Fabrication of co-doped Hydroxyapatite as a Dual-Modal Probe for Tumor-specific Bioimaging**

Ronghui Zhou<sup>a</sup>, Yanjing Li<sup>a</sup>, Dexuan Xiao<sup>a</sup>, Ting Li<sup>a</sup>, Tao Zhang<sup>a</sup>, Wei Fu<sup>b</sup>, Yunfeng Lin<sup>a\*</sup>

State Key Laboratory of Oral Diseases, West China Hospital of Stomatology, Sichuan University, Chengdu 610041, China.

\*Corresponding author: Yunfeng Lin,  
E-mail address: [yunfenglin@scu.edu.cn](mailto:yunfenglin@scu.edu.cn)

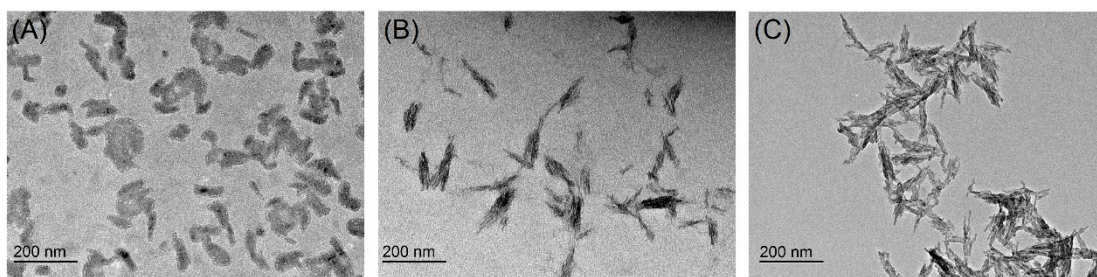

**Fig. S1** Effect of hyaluronan concentration on the morphology of HA@nFAP:Eu/Ba: (A) HA/Ca=1.65; (B) HA/Ca=3.3; (C) HA/Ca=4.95.

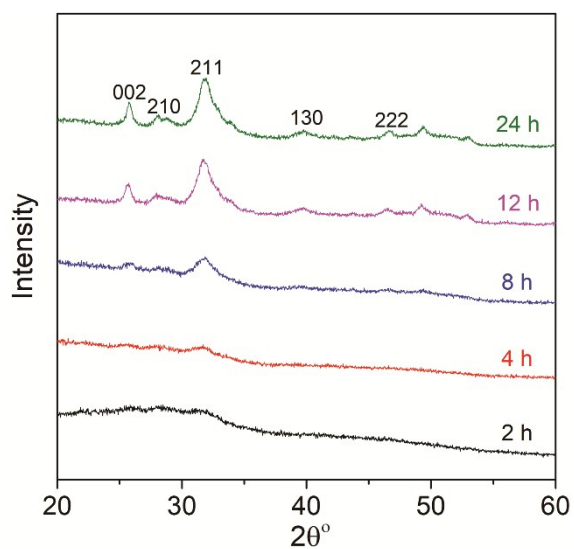

**Fig. S2** XRD patterns of the HA@nFAP:Eu/Ba prepared at different time.

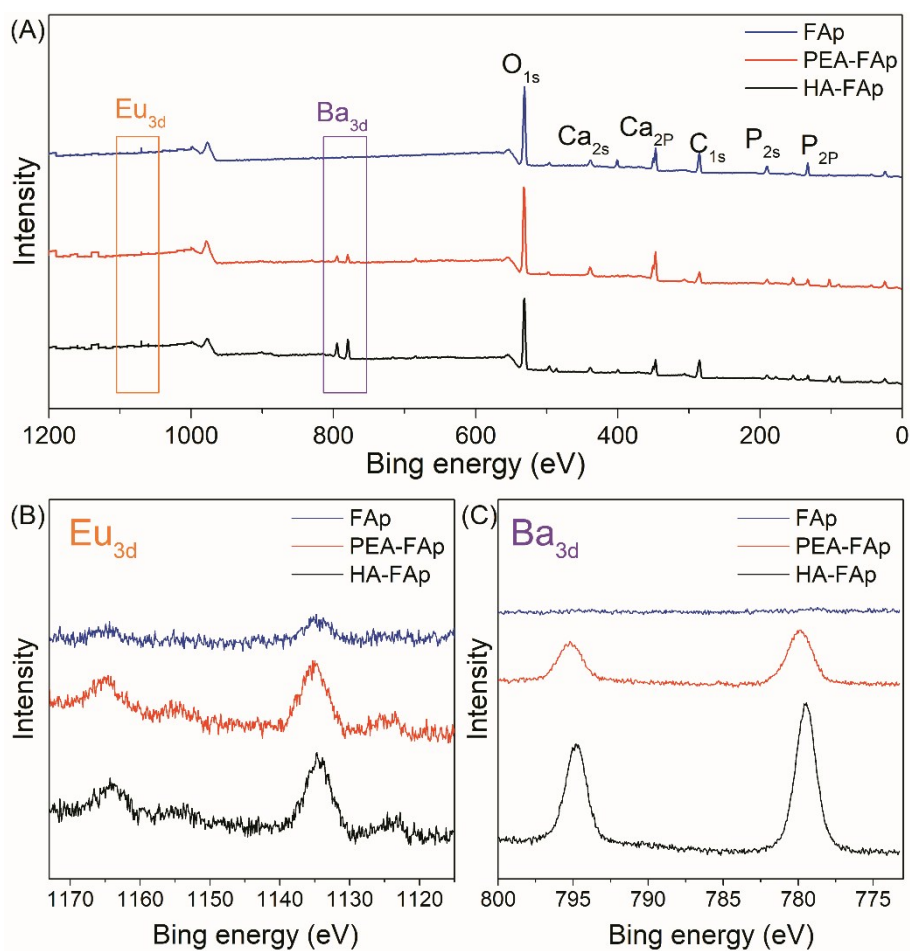

**Fig. S3** XPS patterns of the three co-doped nFap nanoparticles: (A) the whole spectrum; (B) Eu<sub>3d</sub>; (C) Ba<sub>3d</sub>.

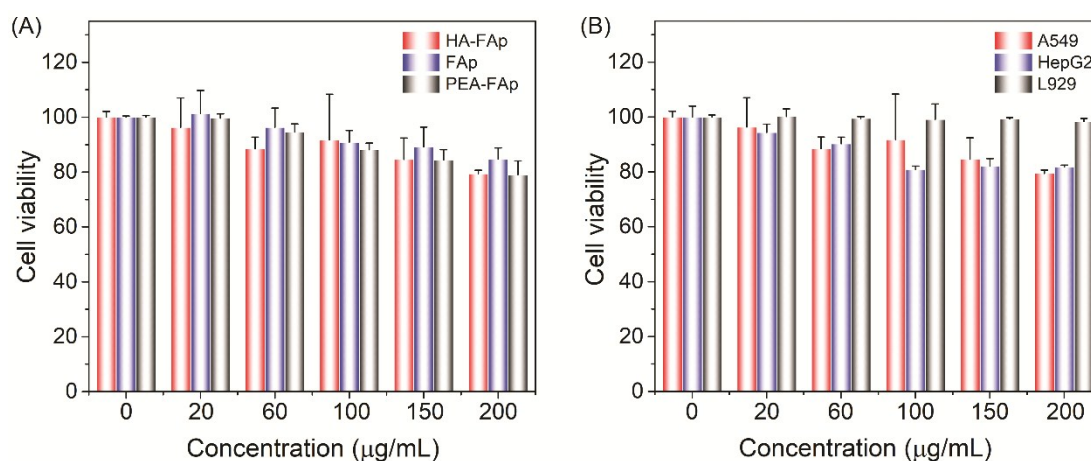

**Fig. S4** (A) CCK-8 examinations of A549 cells cultured with HA@free nFap:Eu/Ba, HA-free nFap:Eu/Ba and PEA@ nFap:Eu/Ba NPs for 48 h at 37 °C and (B) different kinds of cells cultured with HA@free nFap:Eu/Ba for 48 h at 37 °C.

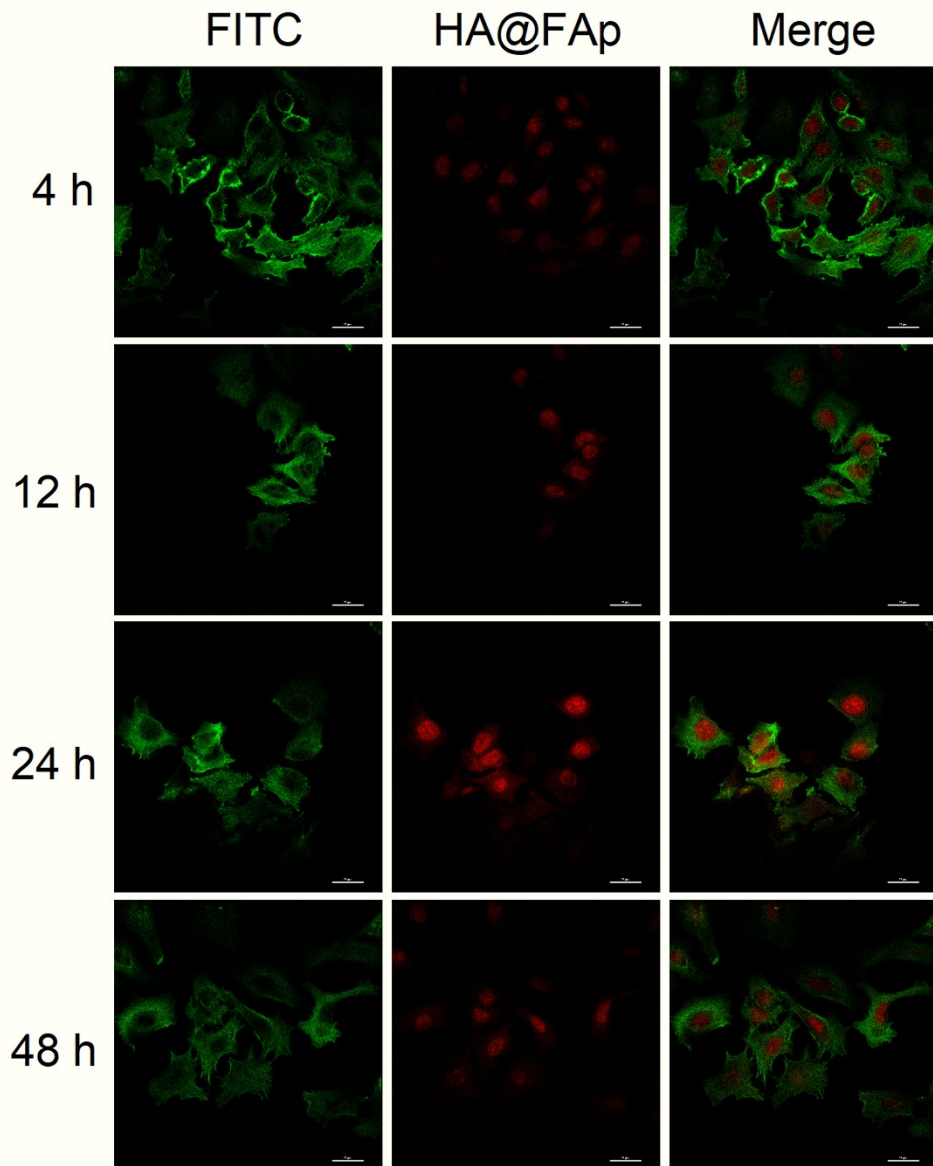

**Fig. S5** CLSM images of the HA@nFap:Eu/Ba NPs incubation with A549 cells for different time.

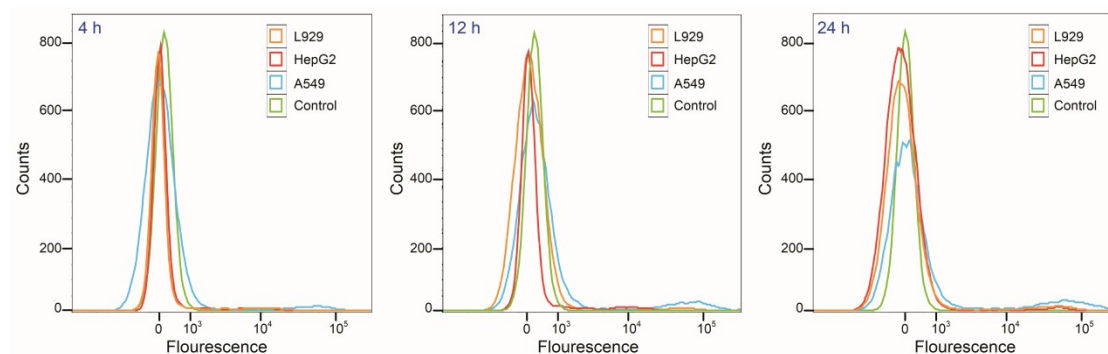

**Fig. S6** Cellular uptake of the HA@nFap:Eu/Ba NPs in different kind of cells studied by flow cytometry.

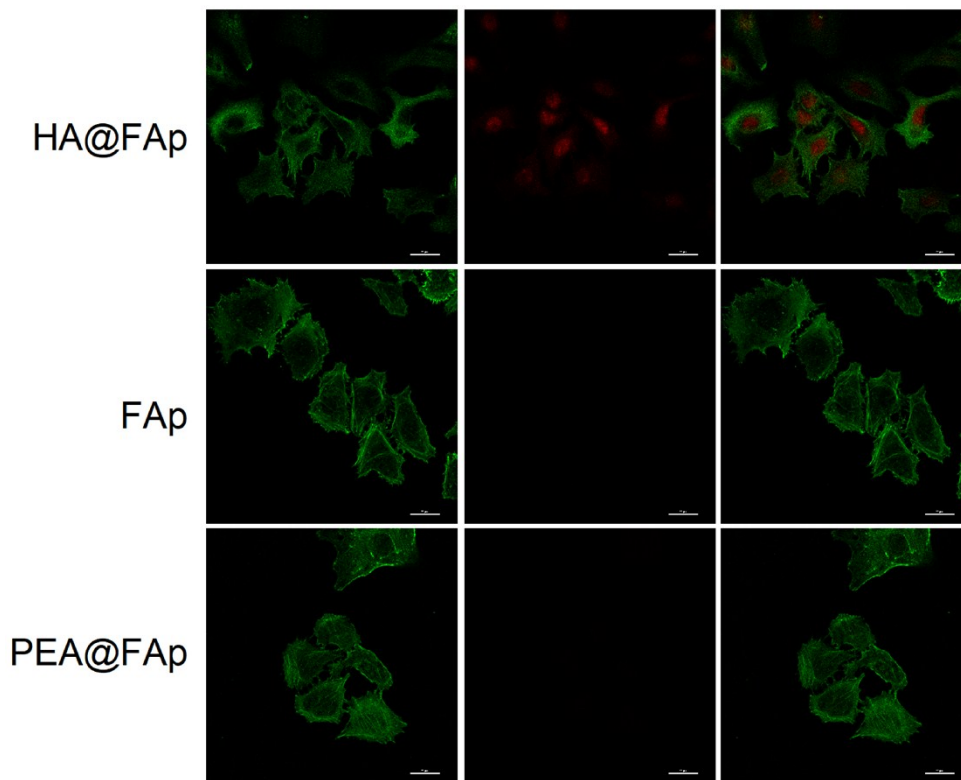

**Fig. S7** CLSM images of the three co-doped nFAp NPs incubation with A549 cells.
